# Supplementary figures and images for: A novel missense mutation in CCDC88C activates the JNK pathway and causes a dominant form of spinocerebellar ataxia
Source: HighWire-hosted journal article supplement (doi:10.1136/jmedgenet-2014-102333), 2014-07-25

# Figure S1

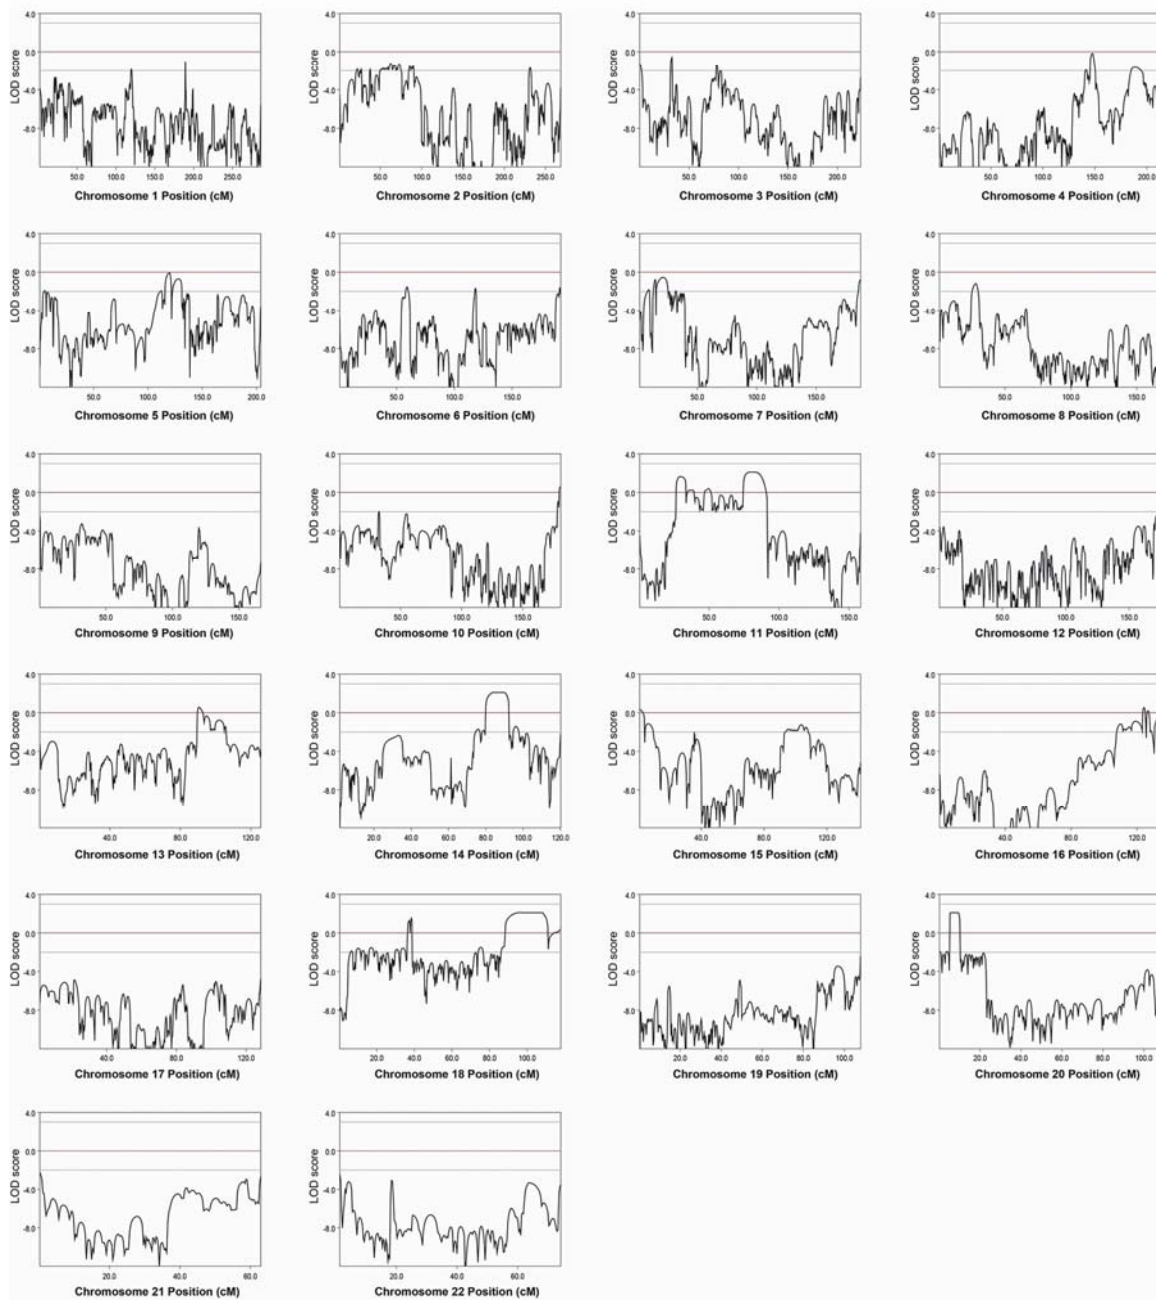

Figure S2

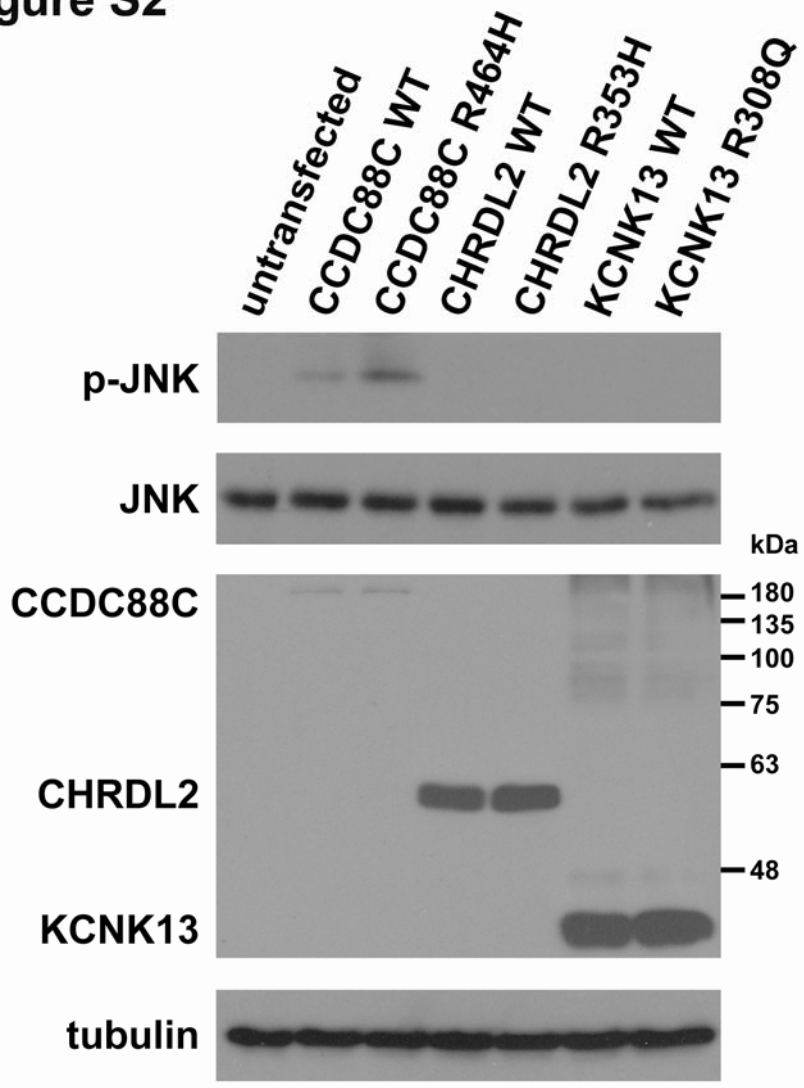



# Figure S4

A

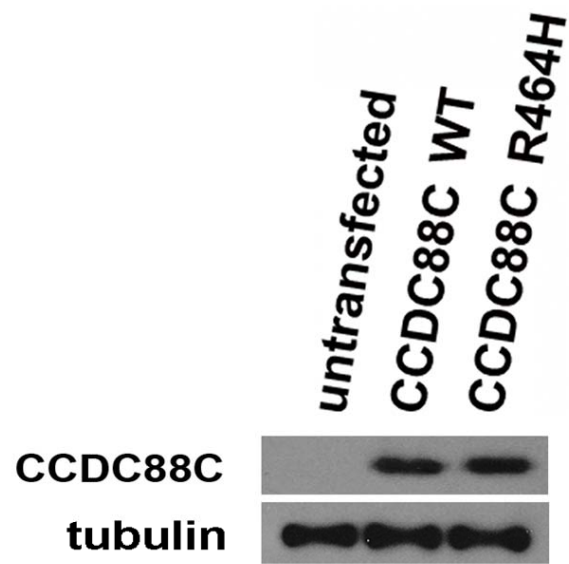

B

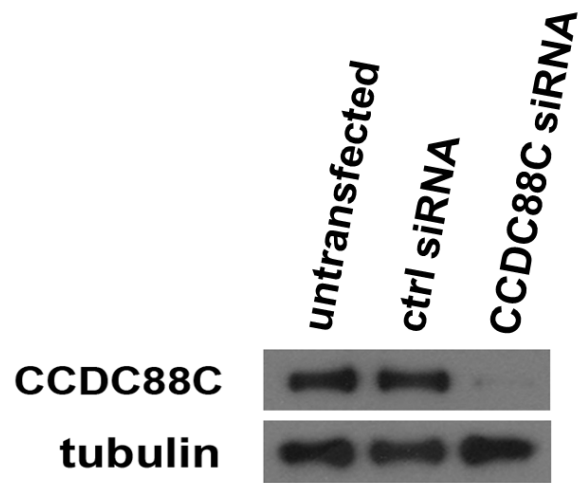

Figure S5

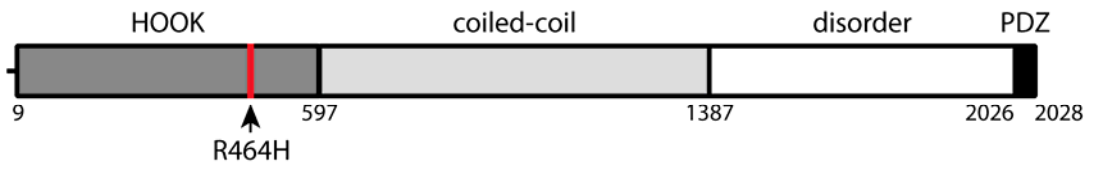

Figure S6

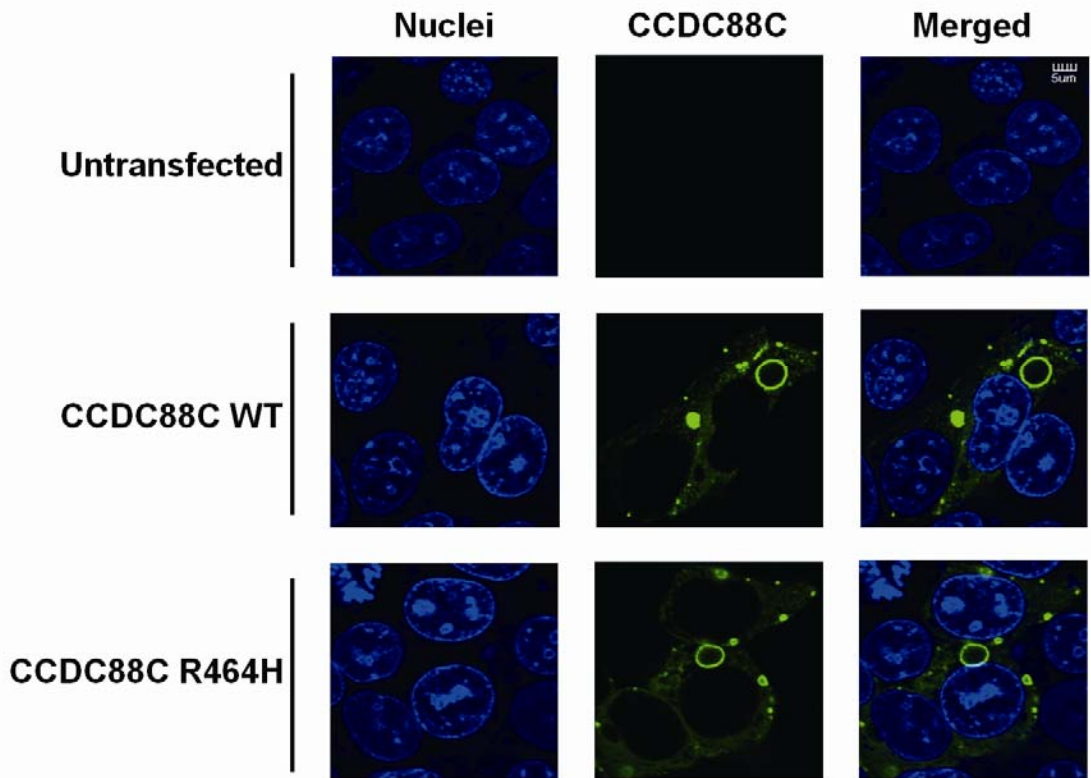

Supplement: jmedgenet-2014-102333supp_figures.pdf [file jmedgenet-2014-102333supp_figures.pdf]
